# Supplementary material
Source: Springer Nature journal article supplement (https://www.springermedizin.de/resource/supplementary/12885_2014_4636_MOESM10_ESM.pdf/9466914)

Xenografts

Primary tumor

HE

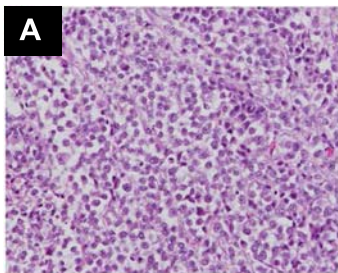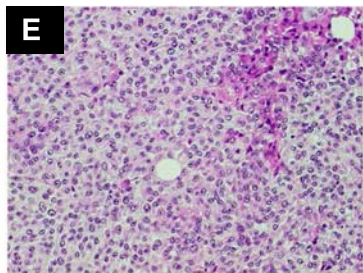

S-100

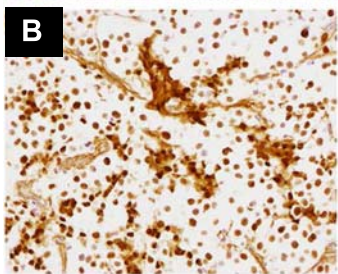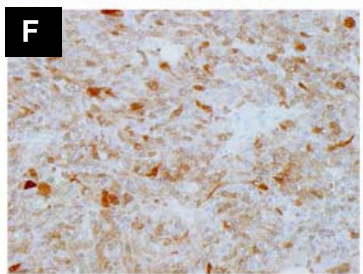

Melan-A

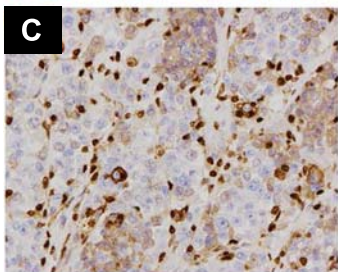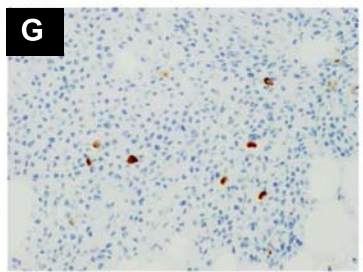

HMB45

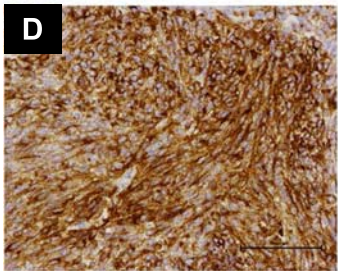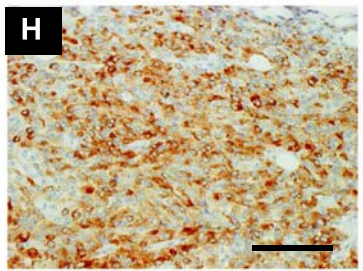

Supplement: MOESM10 [file 9466914]
